# Supplementary material for: Serial measurement of pancreatic stone protein for the early detection of sepsis in intensive care unit patients: a prospective multicentric study
Source: Springer Nature journal article supplement (doi:10.1186/s13054-021-03576-8), 2021-04-20

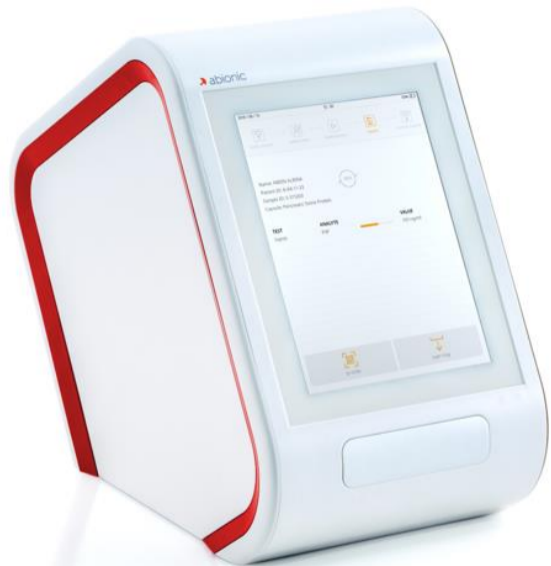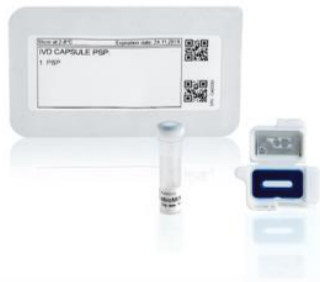

Supplement: MOESM2 [file 19087310]
