# Supplementary material for: Serial measurement of pancreatic stone protein for the early detection of sepsis in intensive care unit patients: a prospective multicentric study
Source: Springer Nature journal article supplement (doi:10.1186/s13054-021-03576-8), 2021-04-20
Supplement: MOESM3 [file 19087310]

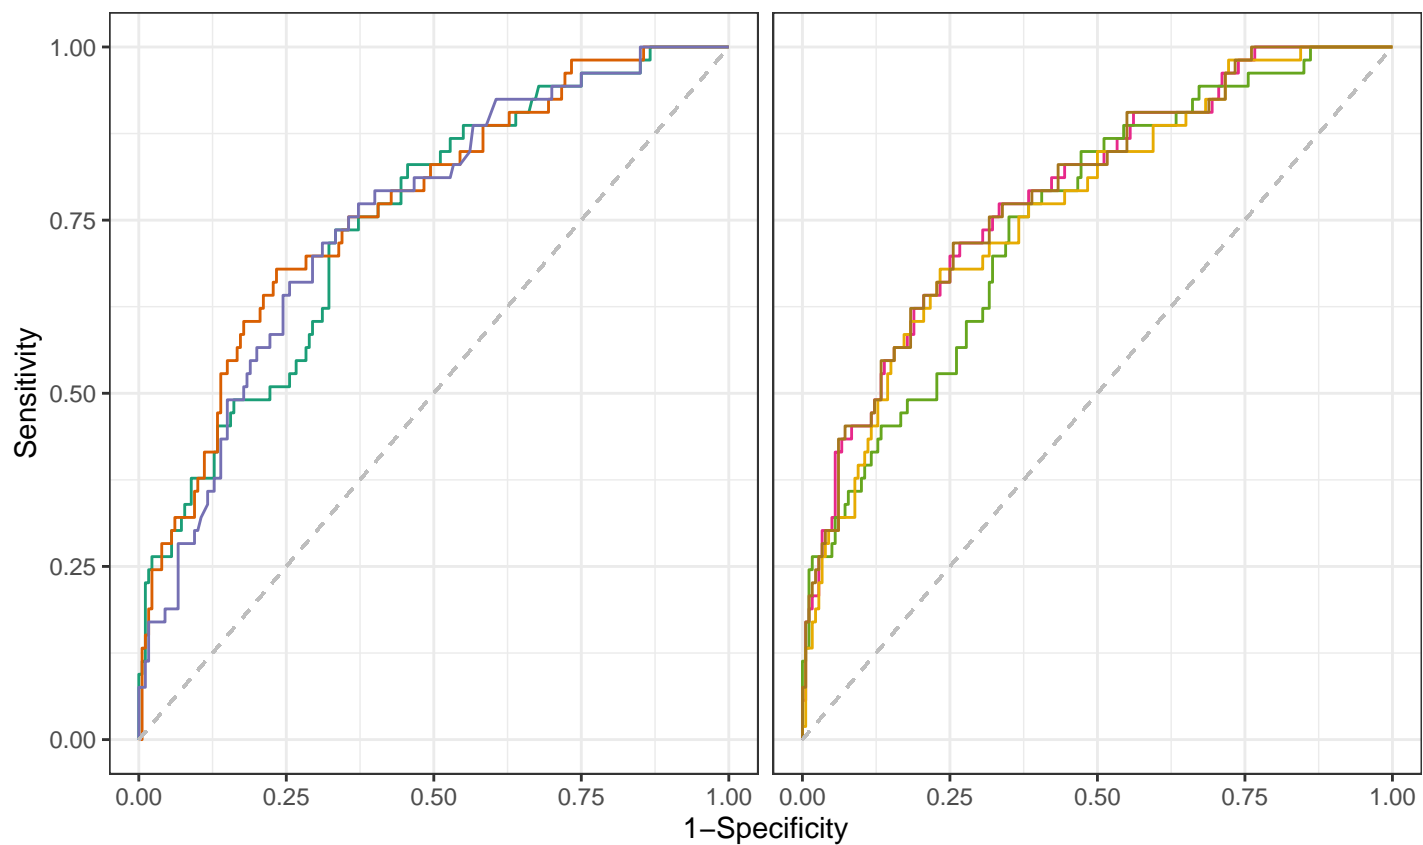

- PSP (left panel)
 — PSP-CRP (right panel)
 — CRP-PCT-PSP (right panel)
- CRP (left panel)
 — PSP-PCT (right panel)
- PCT (left panel)
 — CRP-PCT (right panel)
